# Supplementary material for: Impact of Raw, Roasted and Dehulled Chickpea Flours on Technological and Nutritional Characteristics of Gluten-Free Bread
Source: MDPI journal article supplement (doi:10.3390/foods11020199), 2022-01-12
Supplement: s1 [file s1]

# Impact of Raw, Roasted and Dehulled Chickpea Flours on Technological and Nutritional Characteristics of Gluten-Free Bread

Gokcen Kahraman, Sebnem Harsa, Maria Cristina Casiraghi, Mara Lucisano and Carola Cappa

**Table S1.** Changes in moisture content (g/100g) and water activity of breads during 95 hours of storage.

|                                       | Time |                            |                              |                            |                            |
|---------------------------------------|------|----------------------------|------------------------------|----------------------------|----------------------------|
|                                       | (h)  | RF                         | RF+CF                        | RF+RCF                     | RF+DCF                     |
| Moisture (g/100g)                     | 2    | 42.92 ± 0.96 <sup>Aa</sup> | 43.01 ± 0.48 <sup>Aa</sup>   | 42.97 ± 0.09 <sup>Aa</sup> | 40.15 ± 0.05 <sup>Ab</sup> |
|                                       | 23   | 42.74 ± 0.93 <sup>Aa</sup> | 42.75 ± 0.30 <sup>ABa</sup>  | 42.80 ± 0.17 <sup>Aa</sup> | 39.94 ± 0.16 <sup>Ab</sup> |
|                                       | 47   | 42.11 ± 0.73 <sup>Aa</sup> | 41.95 ± 0.05 <sup>ABCa</sup> | 42.38 ± 0.19 <sup>Aa</sup> | 39.41 ± 0.34 <sup>Ab</sup> |
|                                       | 71   | 41.30 ± 0.40 <sup>Aa</sup> | 41.21 ± 0.12 <sup>Ca</sup>   | 41.63 ± 0.01 <sup>Aa</sup> | 38.65 ± 0.71 <sup>Ab</sup> |
|                                       | 95   | 41.90 ± 0.06 <sup>Aa</sup> | 41.62 ± 0.44 <sup>BCa</sup>  | 42.11 ± 0.76 <sup>Aa</sup> | 38.57 ± 0.43 <sup>Ab</sup> |
| Moisture loss during storage (g/100g) |      | 2.39                       | 3.22                         | 2.00                       | 3.94                       |
| Water Activity                        | 2    | 0.994 ± 0.006              | 0.992 ± 0.007                | 0.989 ± 0.006              | 0.993 ± 0.007              |
|                                       | 23   | 0.995 ± 0.002              | 0.992 ± 0.007                | 0.988 ± 0.012              | 0.991 ± 0.007              |
|                                       | 47   | 0.993 ± 0.007              | 0.991 ± 0.010                | 0.987 ± 0.011              | 0.992 ± 0.007              |
|                                       | 71   | 0.996 ± 0.005              | 0.991 ± 0.007                | 0.989 ± 0.001              | 0.991 ± 0.004              |
|                                       | 95   | 0.993 ± 0.001              | 0.988 ± 0.003                | 0.987 ± 0.006              | 0.987 ± 0.004              |

RF, rice flour; CF, raw chickpea flour; RCF, roasted chickpea flour; DCF, dehulled chickpea flour. <sup>A-D</sup> Means having different letters in the same column are significantly different ( $P < 0.05$ ). <sup>a-c</sup> Means having different letters in the same row are significantly different ( $P < 0.05$ ). No significant differences ( $P > 0.05$ ) observed for water activity values. Values are mean ± SD.

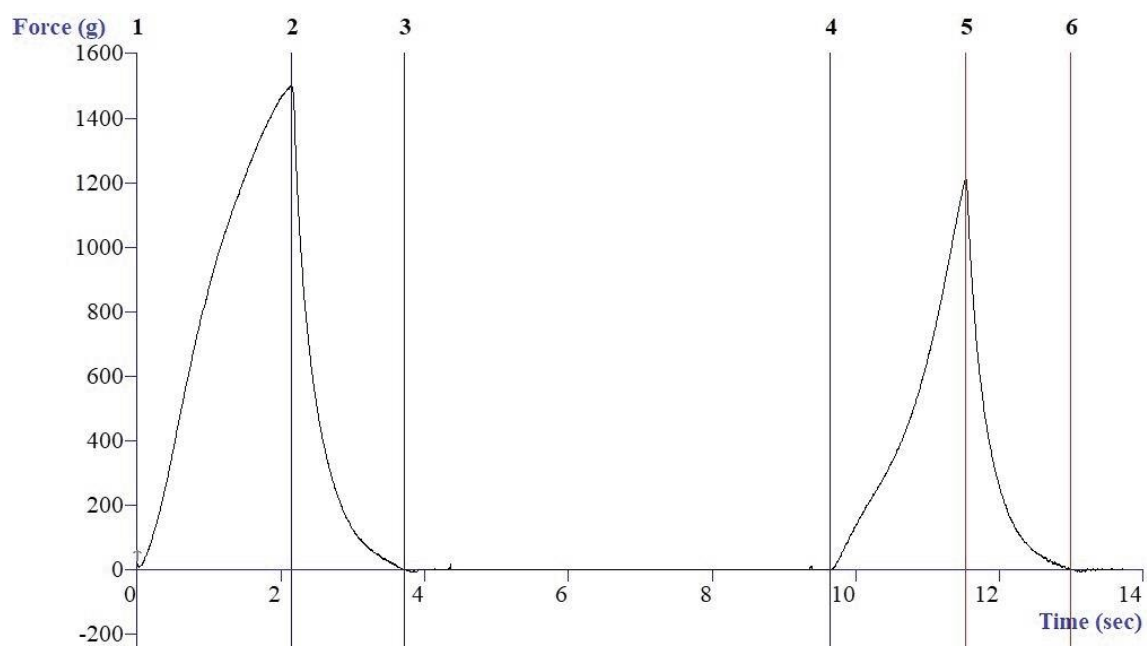

**Figure S1.** Representative force (g) versus time (s) curve of TPA
